# Supplementary material for: Transketolase Regulates the Metabolic Switch to Control Breast Cancer Cell Metastasis via the α-Ketoglutarate Signaling Pathway
Source: Oxford University Press journal article supplement (doi:10.1158/0008-5472.can-17-2906), 2018-03-29
Supplement: 00085472can172906-sup-189657_2_supp_4612115_p57j9f.doc [file 00085472can172906-sup-189657_2_supp_4612115_p57j9f.doc]

**Supplementary Figure Legends**

**Figure S1 Identification of differentially expressed proteins in tumors of different sizes.**

BALB/c mice were orthotopically injected with 4T1 cells (1 x 104 cells) and subsequently tumors with 0.5, 1 and 2 cm in size were collected. Differentially expressed proteins were identified when 1cm (B) and 2 cm (C) tumor samples were compared with the 0.5 cm (A) tumors by using 2-DE approach (Table S1). (D) The significantly expressed metabolic proteins (1.5 fold increase or decrease) from comparing the 1 cm vs. 0.5 cm and 2 cm vs. 0.5 cm tumor size groups were identified based on MALDI-TOF MS and MASCOT analysis. Those with protein score higher than the threshold of green zone were considered significant (P < 0.05).

**Figure S2 TKT levels were expressed highest in lymph node metastatic tissues**

(A) MDA-MB-231 cells were transfected with GFP-TKTL1/pCMV plasmids (1 μg/uL). After 48h, cells with GFP-TKTL1/pCMV were selected by flow cytometry and overexpression efficiency was confirmed by western blot. β-actin was served as the internal control. (B) The paraffin-embedded sections of tumor cells with TKTL1 overexpression were stained with mouse monoclonal anti-TKT antibody (clone 7H1AA1, abcam, 1 mg/mL, 1:75 dilution) or rabbit polyclonal anti-TKTL1 antibody (clone N1C1, Genetex, 1 mg/mL, 1:75 dilution) (Origene, RG205218). (C) TKT expression was detected in 30 normal, 101 tumor and 61 lymph node metastatic tumor tissues. The human breast cancer specimens included 11 matched normal, primary tumor and lymph node metastatic tissues and other tissues from commercial tissue arrays. LN represents lymph node metastatic tissues. The staining intensities of TKT in each specimen were evaluated by one pathologist and 2 independent investigators and graded as follows: no expression, weak (**+**); moderate (**++**); strong (+++). The P values were calculated by one-way ANOVA with Tukey test. (D) The quantitative results showed that TKT expression in tumor cells, but not including stroma cells, in primary tumor and lymph node metastatic tissues. The statistical analyses were calculated by D’Agostino and Pearson omnibus normality test and non-parameter Mann-Whitney test (***P < 0.001).

**Figure S3 Knockdown of TKT suppresses lung metastasis of breast cancer cells *in vivo*.**

MDA-MB-231-IV2-3 cells were transfected with 20 μM of siCon (A) or siTKT (B). 48h later, 1 x 106 cells per mouse were injected intravenously into CB17-SCID mice via tail veins. Lung metastases and the relative abundancy of the injected cancer cells were quantified using *in vivo* (Fig. S3A-S3B) and *ex vivo* (Fig. S3C-S3D) live animal BLI signal analysis (n=8). Lung tissues of tumor cells treated with siCon (Fig. S3E) or with siTKT (Fig. S3F) were harvested one month later and examined by H&E staining (scale bar: 1 mm). T represents tumor cells in the lung. Stable control cells (MDA-MB-231-shNC) (G) and two independent stable TKT knockdown lines MDA-MB-231-shTKT-1 (H) and MDA-MB-231-shTKT-2 (I) were orthotopically injected with 1 x 106 cells per mouse into 4th mammary fat pads of CB17-SCID mice (n = 7). T represents tumor size in the mammary fat pads of each mouse.

**Figure S4 Downregulation of TKT does not affect lung targeting of breast cancer cells.**

MDA-MB-231-IV2-3 cells were transfected with 20 μM of siCon (A) or siTKT (B). 48h later, 1 x 106 cells per mouse were injected into CB17-SCID mice via tail veins. 30 min later (A-C), the relative abundance of cells in lung were quantified using live animal BLI imaging (n=8). The result showed that there was no significant difference of ROI signals in the siCon versus siTKT groups (P = 0.294). After 24h, the lung was perfused with PBS and the expression levels of human GAPDH in lung tissues were measured by using qPCR (D). There was no significant difference at this time either. (E) For colony assay, MCF-7 cells were transfected with 20 μM of siCon or siTKT for 48h. The knockdown efficiency of TKT in MCF-7 cells was estimated by western blot and β-actin was served as the internal control. Hs578T cells were transfected with 20 μM of siTKT. After transfection for 8h, these cells were cultured with 1 mM α-KG reagent or culture medium.The effects of TKT overexpression on cell proliferation at 24 (F), 48 (G) and 72h (H) and functional rescue by α-KG treatment were analyzed. Multiple groups were compared by one-way ANOVA with Tukey test (**P < 0.01,, ***P < 0.001).

**Figure S5 Reduction of TKT or α-KG treatment results in changes of glycolytic and TCA cycle metabolites.**

(A) MDA-MB-231 cells were transfected with 20 μM of siCon or siTKT RNA. (B) MDA-MB-231 cells were treated without or with 1 mM α-KG. 48h later, cell lysates were harvested for UPLC-MS-Multiple Reaction Monitoring (MRM) analysis (*P < 0.05, **P < 0.01, ***P < 0.001).

**Figure S6 Reduction of TKT or α-KG treatment affects the expression levels of TCA cycle and glycolytic enzymes.**

(A) MDA-MB-231 cells were transfected with 20 μM of siCon or siTKT RNA. (B) MDA-MB-231 cells were treated without or with 1 mM α-KG. 48h later, cell lysates were harvested for detecting the expression levels of TCA cycle enzymes(A-B) and glycolytic enzymes (C) by western analysis. β-actin was used to serve as the internal control. α-KG DeH: α-KG dehydrogenase, malate DeH: malate dehydrogenase, SDH: succinate dehydrogenase, FH: fumarate hydratase, SUCLA2: succinate-CoA ligase, HK: hexokinase, PMK2: pyruvate kinase M2, PFK: phosphofructokinase, G6P isomerase: glucose-6-phosphate isomerase. (D) The expression correlation of TKT with PKM2 from Oncomine database (Miller dataset) (n = 116, r = 0.4635, P < 0.0001) was calculated by non-parametric Spearman correlation. Kaplan-Meier curve for TKT and PKM2 expression in association with recurrence-free survival (RFS) of breast cancer (n = 3951, E) or triple-negative breast cancer (TNBC) (n = 255, F) patients were analyzed. Kaplan-Meier curve for TKT, PKM2 and HIF-1α expression in association with RFS of breast cancer (n = 3951, G) and TNBC (n = 255, H) patients. (I) Effects of TKT knockdown or α-KG treatment on MDM2 levels were detected by western blot. (J) The expression correlation of TKT with MDM2 from Oncomine database (Desmedt dataset) (n = 198, r = -0.2618, P < 0.0001) was calculated by non-parametric Spearman correlation. Kaplan-Meier curve for MDM2 expression in association with RFS of breast cancer patients (n = 3951, K). Patients were divided into high (red line) and low (black line) groups based on the median levels among the patients analyzed (logrank test). The RFS data were analyzed by Kaplan Meier-plotter (breast cancer) database.
